# Supplementary material for: The impact of Arctic sea ice loss on mid-Holocene climate
Source: PubMed Central journal article supplement (PMC6212424; doi:10.1038/s41467-018-07068-2), 2018-11-01
Supplement: 41467_2018_7068_MOESM1_ESM.pdf [file 41467_2018_7068_MOESM1_ESM.pdf]

1 **Supplementary information:**

2 **The impact of Arctic sea ice loss on mid-Holocene climate**

3 Park et al.

4

5

**Sea level pressure in winter (DJFM)**

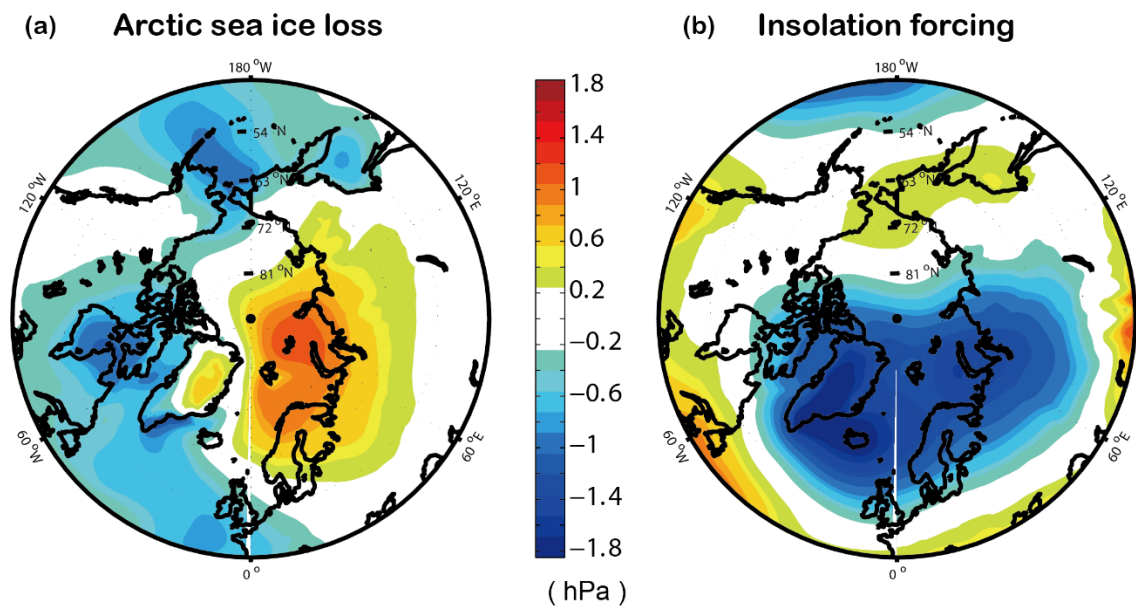

8 **Supplementary Figure 1:** Sea level pressure responses to (a) Arctic sea ice loss and (b)  
9 insolation forcing in winter (December–March).

10

11

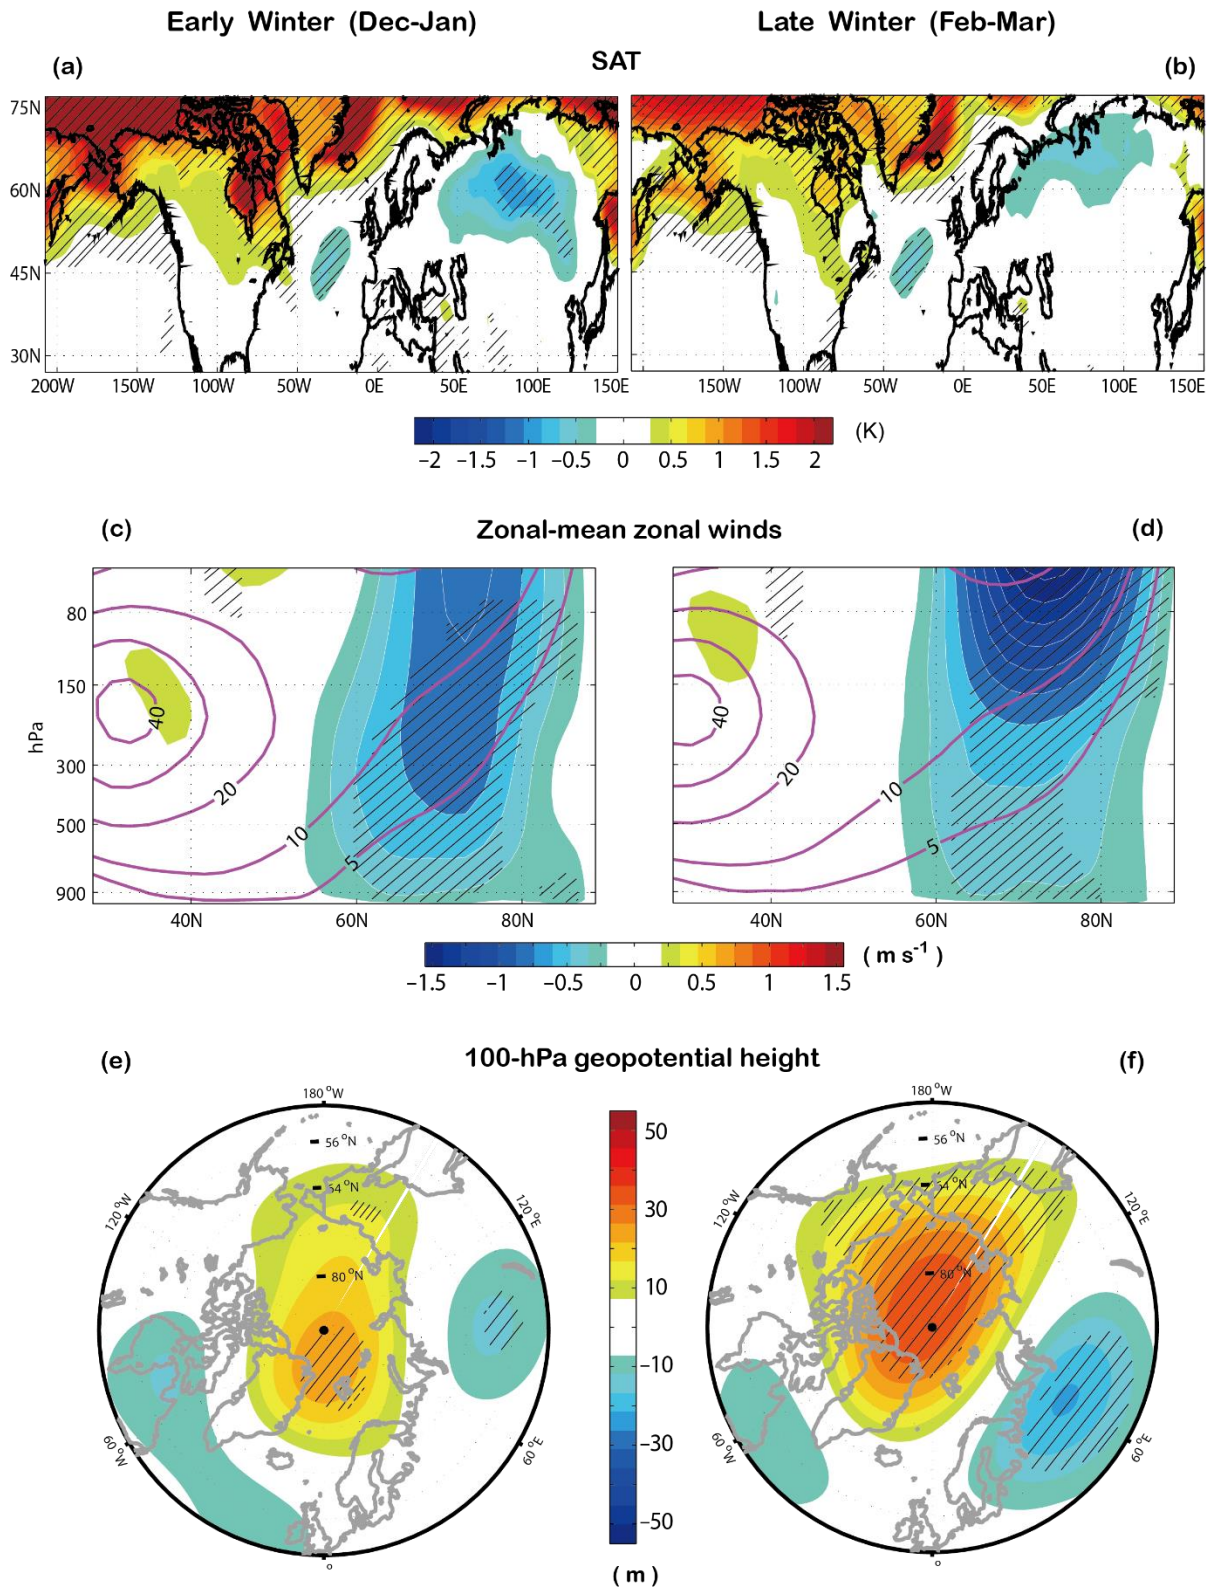

12

13 **Supplementary Figure 2:** (a, b) Surface air temperature (K), (c, d) zonal-mean zonal winds  
 14 (m s<sup>-1</sup>) and (e, f) 100-hPa geopotential height (m) responses to Arctic sea ice loss during (left

15 column: **a, c, e**) early winter (December – January) and (right column: **b, d, f**) late winter  
16 (February – March). In (**c, d**), purple lines are climatological-mean zonal-mean zonal winds  
17 from the mid-Holocene with pre-industrial sea ice simulation. For all plots, statistically  
18 significant values ( $p < 0.05$ ) are hatched.

19

20

21

22

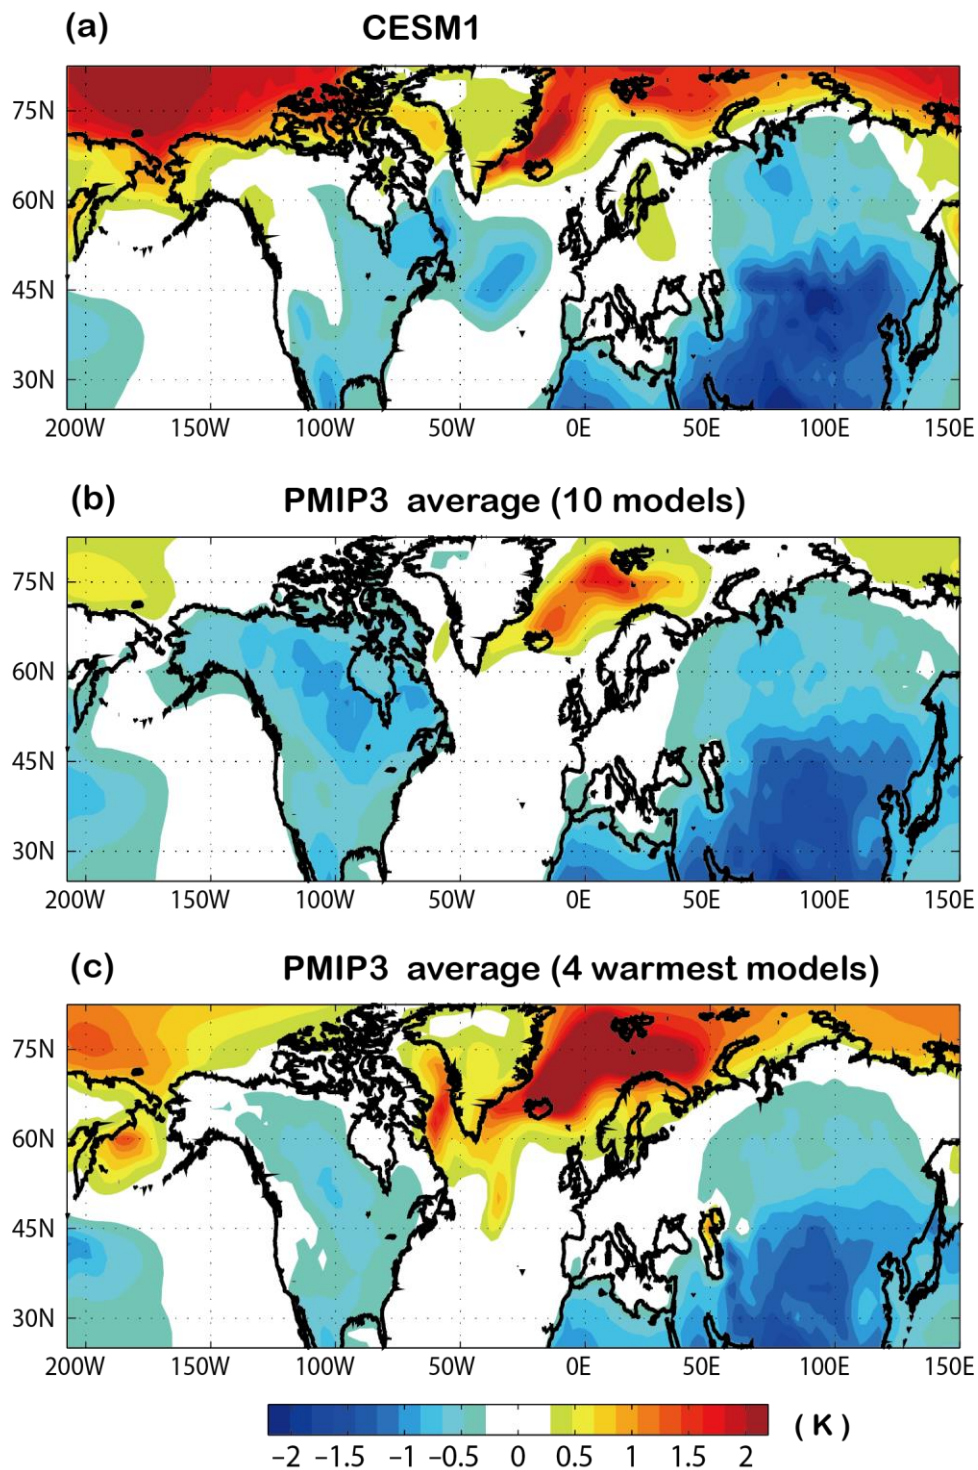

23

24 **Supplementary Figure 3:** The wintertime (December–March) SAT anomalies in the mid-  
 25 Holocene simulation (differences between the mid-Holocene and pre-industrial simulations)  
 26 from (a) CESM1, (b) the PMIP3 multi-model average (10 models) and (c) PMIP3 average of  
 27 4 warmest models in the Arctic.

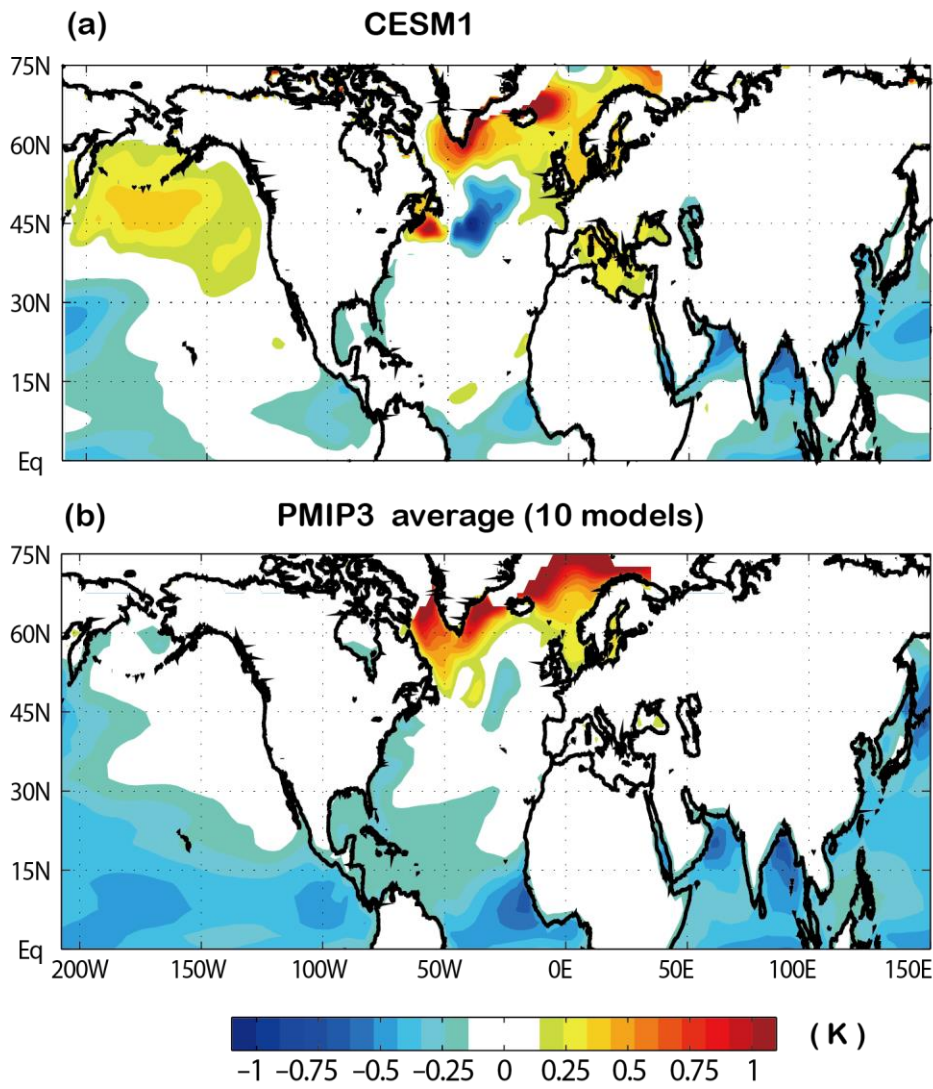

29

30

31 **Supplementary Figure 4:** The annual-mean SST anomalies in the mid-Holocene simulation  
32 (differences between the mid-Holocene and pre-industrial simulations) from (a) CESM1 and  
33 (b) the PMIP3 multi-model average (10 models).

34

35

36

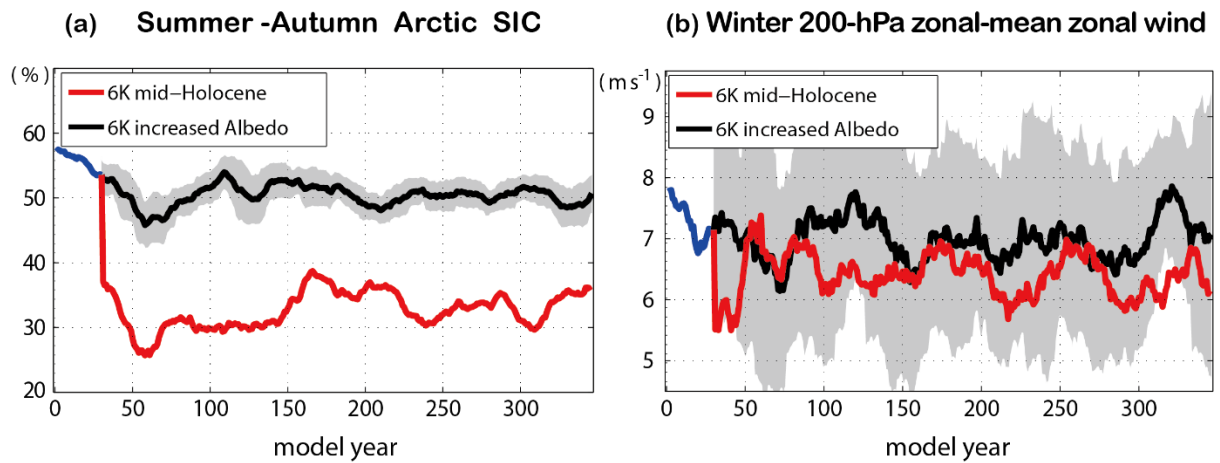

Winter (DJFM): averages of the last 150 years

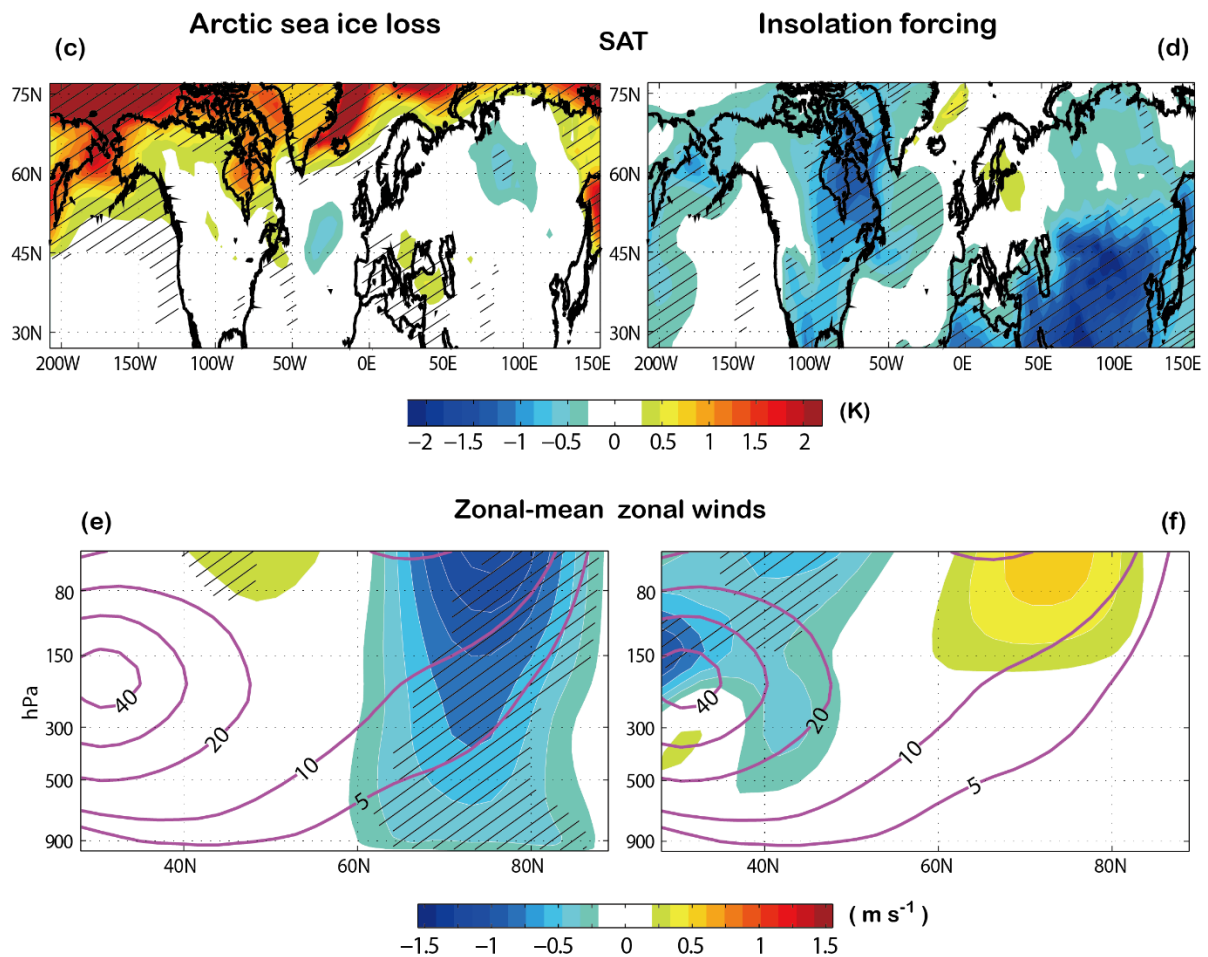

37

38 **Supplementary Figure 5:** The 20-year running averages of (a) Arctic summer (July–  
 39 November) sea ice concentration (%) and (b) the wintertime (December–March) 200-hPa  
 40 zonal-mean zonal wind speed (m s<sup>-1</sup>) averaged from 65°N to 80°N, for the mid-Holocene (red),

41 the mid-Holocene with pre-industrial sea ice (black), and the pre-industrial control (blue)  
42 simulations. The gray shadings indicate the range of 1 standard deviation from the mean of the  
43 mid-Holocene with pre-industrial sea ice (black) simulations. The wintertime (December–  
44 March) responses of **(c, d)** surface air temperature (K) and **(e, f)** zonal-mean zonal winds ( $\text{m s}^{-1}$ )  
45 to mid-Holocene Arctic sea ice loss **(c, e)** and insolation forcing **(d, f)**, averaged over the last  
46 150 years. Supplementary Fig. **5(c, d, e, f)** are same as Fig. **3(a, b, c, d)**, except that the averaging  
47 periods between these two plots are different (last 150 years vs. last 265 years).

48

49

50

51

52

53

Southern Hemisphere summer ( DJFM ) sea ice concentration

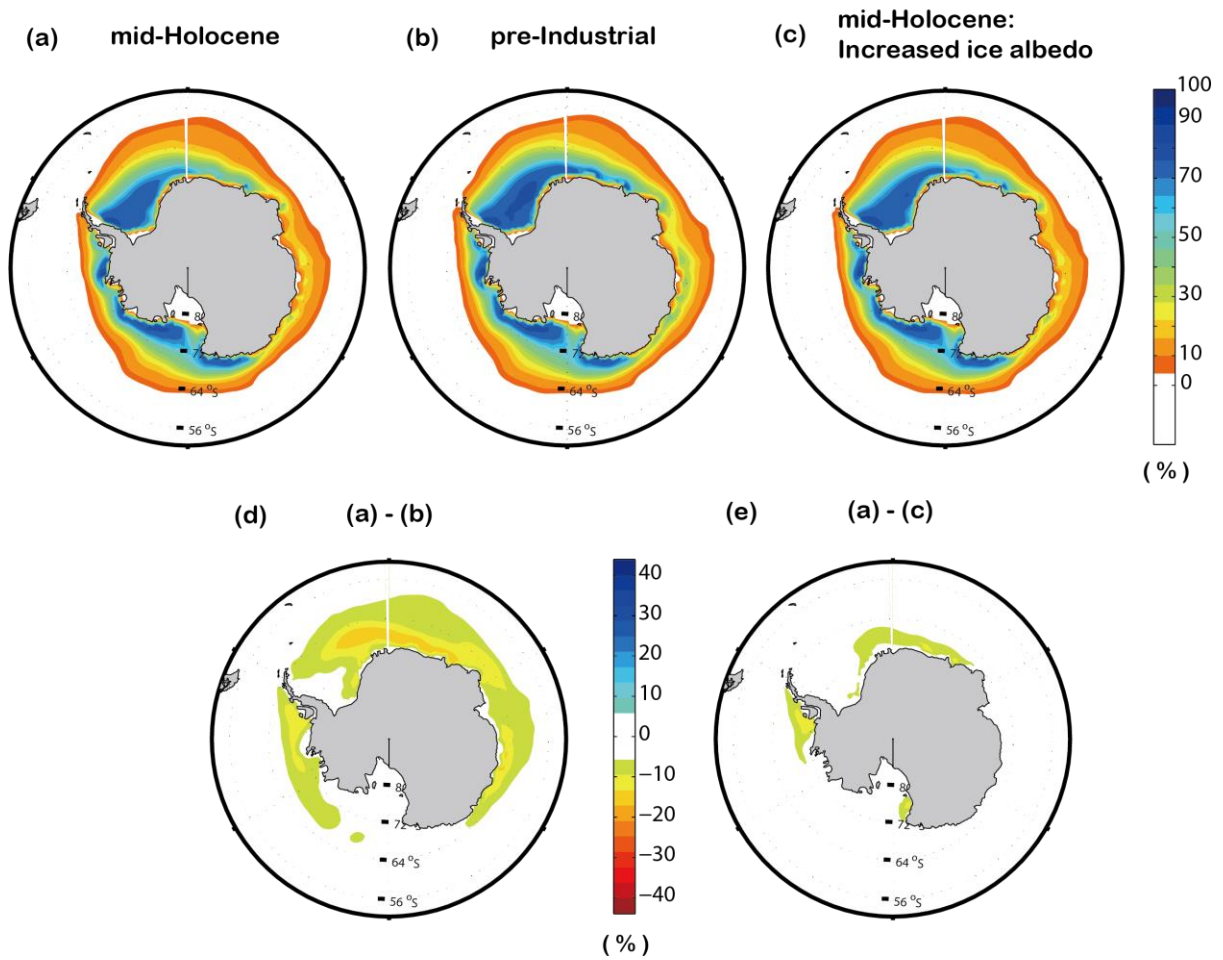

54

55

56 **Supp. Figure 6:** Antarctic sea ice concentration (%) from (a) the mid-Holocene simulation, (b)  
 57 the pre-industrial simulation and (c) the mid-Holocene simulation with increased ice albedo,  
 58 during southern hemisphere summer (DJFM). Sea ice concentration differences (d) between  
 59 mid-Holocene and pre-industrial simulations, i.e. (a)–(b), and (e) between mid-Holocene and  
 60 mid-Holocene with increased ice albedo simulations, i.e. (a)–(c).

61

62
